# Supplementary material for: A Method for Similarity Search of Genomic Positional Expression Using CAGE
Source: PubMed Central journal article supplement (PMC1449887; doi:10.1371/journal.pgen.0020044), 2006-04-28

Liver chr5:89,221,001..89,380,000

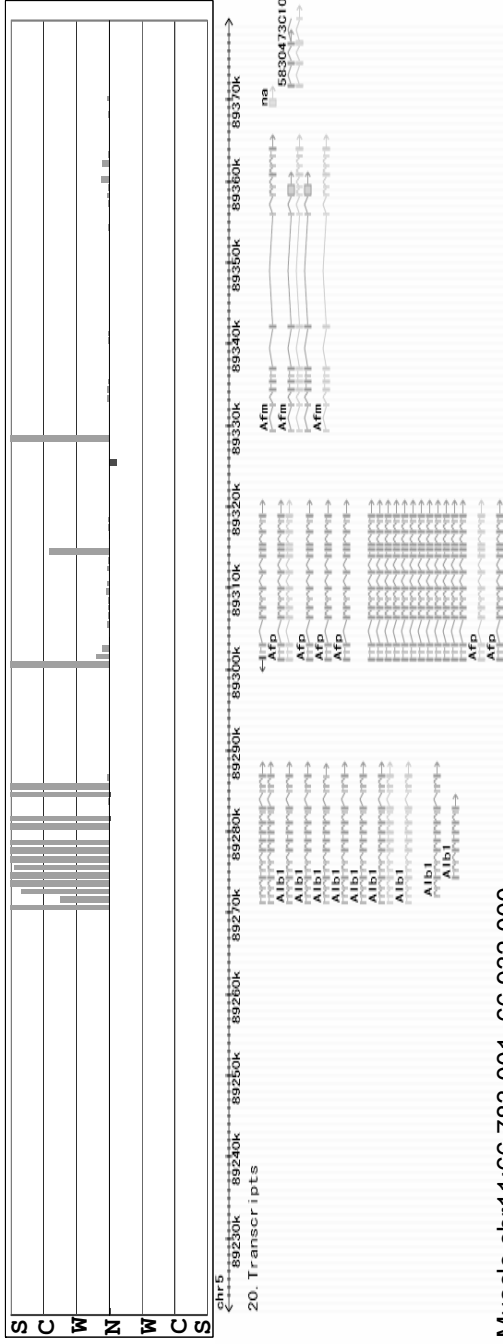

Muscle chr11:66,783,001..66,932,000

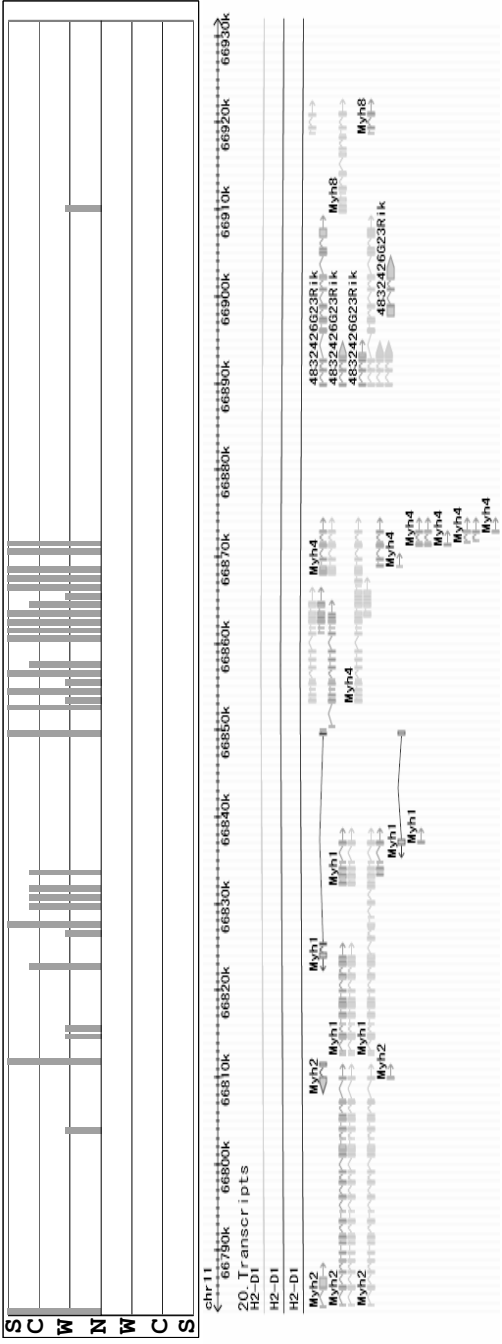

Supplement: pgen.0020044.sg001.pdf [file pgen.0020044.sg001.pdf]
