# Supplementary material for: A Method for Similarity Search of Genomic Positional Expression Using CAGE
Source: PubMed Central journal article supplement (PMC1449887; doi:10.1371/journal.pgen.0020044), 2006-04-28

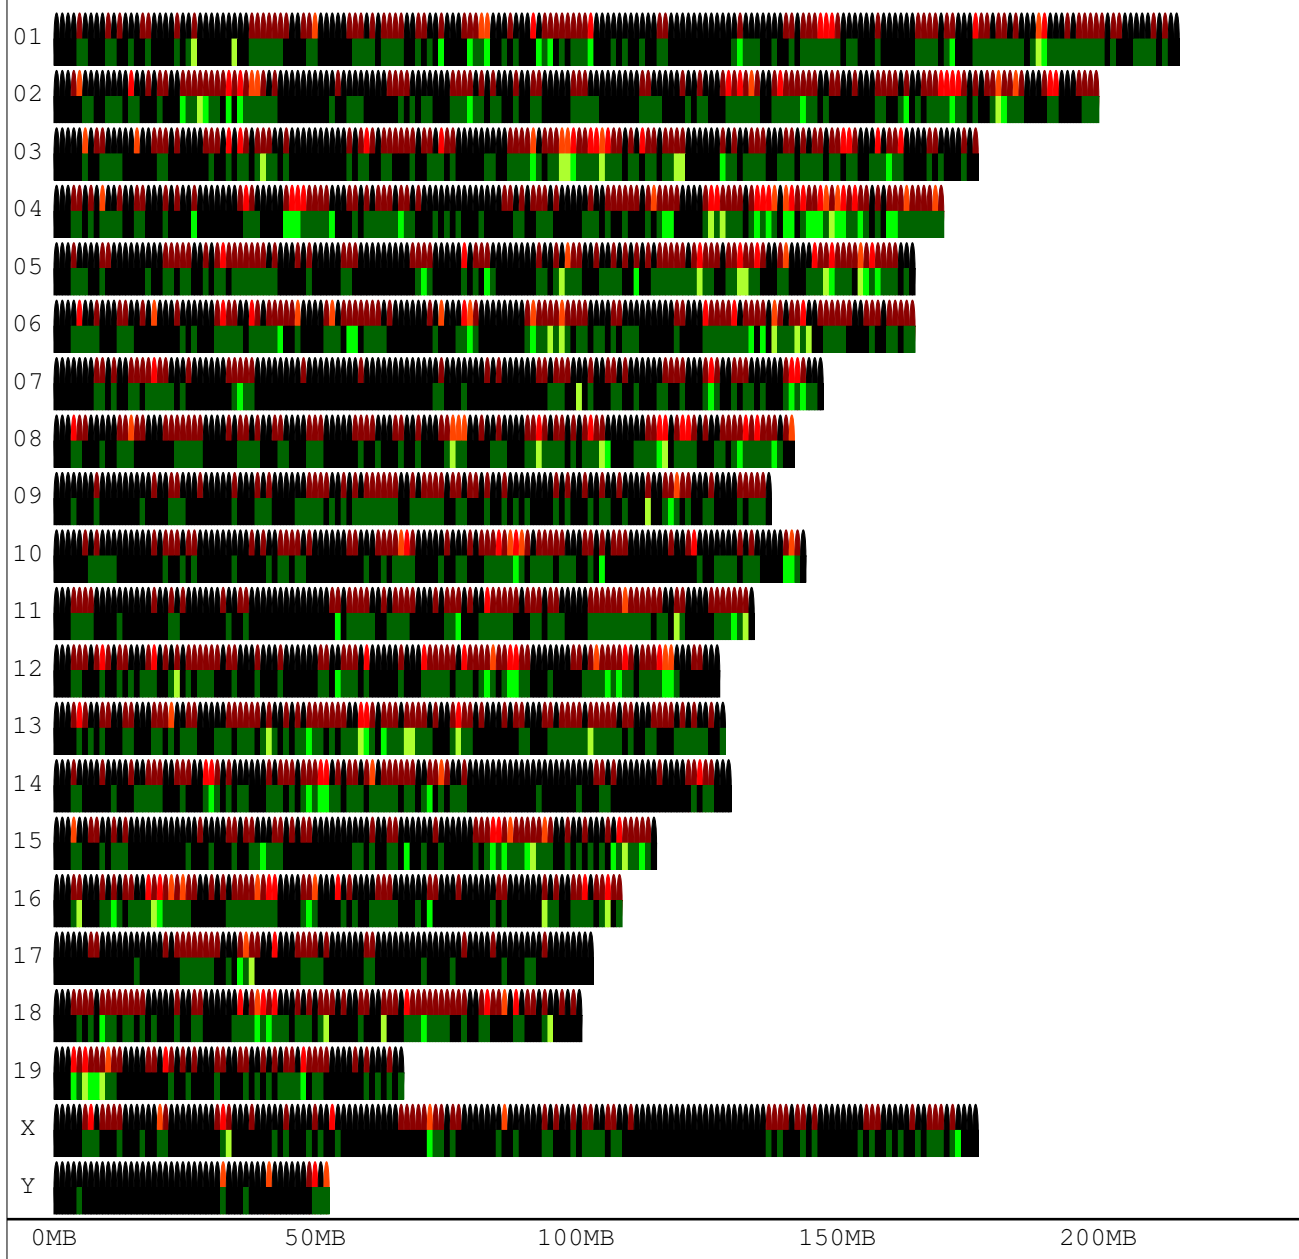

Supplement: pgen.0020044.sg003.pdf [file pgen.0020044.sg003.pdf]
