# Supplementary material for: A Method for Similarity Search of Genomic Positional Expression Using CAGE
Source: PubMed Central journal article supplement (PMC1449887; doi:10.1371/journal.pgen.0020044), 2006-04-28
Supplement: pgen.0020044.st005.pdf [file pgen.0020044.st005.pdf]

|                      |           |
|----------------------|-----------|
| Adipose              | 237,434   |
| Amnion               | 381       |
| Brain                | 122,603   |
| Cerebellum           | 211,541   |
| Cerebral cortex      | 17,510    |
| Diencephalon         | 43,044    |
| Embryo               | 1,077,740 |
| Eye                  | 1,246     |
| Heart                | 34,743    |
| Hippocampus          | 2,728     |
| Liver                | 2,130,614 |
| Lung                 | 1,129,877 |
| Macrophage           | 1,231,138 |
| Mammary gland        | 1,294     |
| Medulla oblongata    | 3,193     |
| Muscle               | 42,294    |
| Placenta             | 249       |
| Prostate gland       | 57,057    |
| Somatosensory cortex | 190,762   |
| Striatal primordia   | 39,693    |
| Testis               | 109,150   |
| Visual cortex        | 211,620   |
| Sum                  | 6,895,911 |
