# Supplementary material for: A Method for Similarity Search of Genomic Positional Expression Using CAGE
Source: PLoS Genet. 2006 Apr 28;2(4):e44. doi: 10.1371/journal.pgen.0020044 (PMC1449887; doi:10.1371/journal.pgen.0020044)
Supplement: Table S2 — This table lists the regions that showed similar expression patterns between the forward and reverse strands in liver (p < 0.001). Statistical significances are indicated in the column “p-value.” Chromosomal positions for the forward and reverse strands are indicated. Information from the corresponding SADB entry is shown on the right. The column “Type” indicates the type of overlapping: C, convergent, tail-to-tail overlapping; D, divergent, head-to-head overlapping; F, full, fully overlapping. (49 KB XLS) [file pgen.0020044.st002.xls]

## Sheet: eval.liver.plusSAS
	Liver
	Searched region					SADB entry
	p-value	Chromosome	Position (+ strand)	Position (- strand)	Representative TU	TU	TU	Overlapping position	Type
						(+ strand)	(- strand)
	7.77814e-11	chr14	26922029..26936829	26943107..26956307	81891	No hit
	1.74805e-08	chr7	129150942..129162642	129120095..129129895	75829	75829	130958	129153890..129156005	F
						75829	81037	129129087..129134978	F
						82219	130958	129155018..129156005	D
						75829	177506	129152457..129158744	F
						75829	167941	129120720..129128797	F
						75829	109652	129117407..129120390	F
						81790	177506	129158366..129158744	D
						82219	177506	129155018..129157584	F
						75829	132336	129145293..129146390	F
						157405	132336	129146181..129146390	D
	1.0958e-07	chr19	45991495..45997695	46006974..46012974	157415	No hit
	3.96058e-07	chr11	69623527..69670927	69624036..69670336	80388	No hit
	4.34127e-07	chr1	75585669..75592469	75580264..75586964	177177	No hit
	6.2669e-07	chr1	75585680..75592380	75580326..75586926	104741	No hit
	1.30594e-06	chr7	16062651..16071251	16257615..16266115	127539	127539	80107	16142765..16164191	F
						82155	120830	16059686..16066012	F
						101372	80107	16142765..16145776	C
						165866	116886	16185686..16193435	D
						150694	120830	16061725..16063051	F
						127539	73355	16094016..16102127	F
						127539	120830	16059686..16066012	F
						127539	73300	16241794..16275867	F
						127539	116886	16184766..16193435	F
						101372	102907	16131962..16132207	D
						127539	226682	16103780..16114949	F
						127539	102907	16123061..16132299	F
						127539	112094	16115800..16117204	F
	1.43147e-06	chr11	102103051..102108151	102069043..102073643	111517	111517	226831	102074268..102078631	F
						82083	132309	102070290..102070862	D
						111517	132309	102070014..102070862	F
	2.06642e-06	chr17	32416228..32430228	32266674..32277974	111848	111848	168179	32265643..32273468	F
						111848	110262	32275234..32277618	F
						111848	132113	32415836..32417026	F
						74278	132113	32415836..32415865	C
						111848	119368	32405011..32406004	F
						71997	132113	32416165..32417026	D
						111848	81749	32314023..32315479	F
	2.06642e-06	chr17	32416202..32430202	32266774..32278074	223866	111848	168179	32265643..32273468	F
						111848	110262	32275234..32277618	F
						111848	132113	32415836..32417026	F
						74278	132113	32415836..32415865	C
						111848	119368	32405011..32406004	F
						71997	132113	32416165..32417026	D
						111848	81749	32314023..32315479	F
	2.72142e-06	chr6	72829489..72845089	72826321..72840421	101482	101482	115475	72831953..72833779	D
	1.18178e-05	chr17	44872090..44882090	44882735..44892535	107110	36943	107110	44869091..44883313	F
	1.29538e-05	chr1	74849071..74854471	74745335..74750435	221887	221887	106798	74745672..74761781	F
						227259	106798	74753060..74756286	F
						99842	106798	74761099..74761781	D
						151036	106798	74745672..74761781	F
	1.29538e-05	chr9	108140868..108146268	108225438..108230838	124945	124945	125901	108213124..108213853	F
						124945	106384	108230093..108291760	F
	1.86995e-05	chr6	86253031..86258831	86238603..86244403	11212	11212	74047	86244504..86244811	D
	1.86995e-05	chr9	20794297..20801597	20800082..20807382	77430	82337	77430	20801224..20801722	C
	2.69938e-05	chr11	75073945..75079345	75048029..75052029	98421	No hit
	2.95885e-05	chr10	93285314..93289514	93294840..93298740	110644	No hit
	3.24325e-05	chr17	33391979..33410579	33334484..33352084	79088	81579	79088	33332420..33334632	F
						131821	177343	33354515..33355149	C
						151279	182402	33390007..33392292	F
						71752	182402	33393942..33401475	D
						101364	79088	33345813..33351772	F
						81579	107119	33334628..33334632	C
						131821	182402	33354461..33355149	F
						151279	79088	33390007..33392292	F
						131821	79088	33354461..33355149	F
						101364	182402	33345813..33351772	F
						81579	182402	33332420..33334632	F
						71752	79088	33393942..33410417	F
	3.8967e-05	chr17	44878435..44882035	44883135..44886535	36943	36943	107110	44869091..44883313	F
	4.27126e-05	chr15	82010028..82026428	82042455..82058055	81572	81572	177349	82015764..82031499	F
						112855	81339	82032651..82033006	C
						112855	177349	82031595..82031678	D
						78976	177349	82023651..82025781	C
						81572	79470	82041726..82067318	F
						81572	81339	82032651..82034755	F
	4.68181e-05	chr15	3100200..3106000	3143197..3148697	226898	No hit
	5.62509e-05	chr9	108102936..108106036	108089113..108092213	81557	124945	81557	108073945..108102288	F
	6.75842e-05	chr4	42670505..42692105	42787508..42807008	174357	174357	108256	42672113..42672179	C
						71428	111952	42692828..42693156	C
	9.75605e-05	chr2	32632090..32642390	32645150..32652850	77525	77525	173916	32642600..32642660	C
	9.75605e-05	chr2	32632026..32642326	32645161..32652861	173916	77525	173916	32642600..32642660	C
	0.000106938	chr17	83263872..83272572	83239711..83247711	182124	74694	182124	83247569..83270806	F
						74694	73048	83247569..83254480	D
	0.000117216	chr2	179719872..179723972	179724331..179727831	102905	No hit
	0.000117216	chr1	171531628..171535928	171411772..171416072	167815	159875	167815	171441331..171459519	F
						121710	167815	171425358..171426647	F
						21108	167815	171414085..171414155	F
						83580	167815	171416931..171429401	F
						132398	167815	171429637..171430485	F
						132398	102765	171429681..171430485	C
						111740	167815	171482560..171489988	F
						176776	167815	171400430..171413557	F
						104513	167815	171508793..171529805	D
						21108	72119	171414085..171414155	F
						177100	167815	171460186..171481530	F
						176776	72119	171411810..171413557	C
	0.000140832	chr6	48505812..48509512	48480942..48484342	73809	113205	73809	48481257..48482280	C
	0.000169205	chr2	164898303..164904203	164897544..164903044	105932	105932	111123	164902631..164904145	C
	0.000169205	chr7	115273109..115278209	115338576..115343576	133074	78823	126184	115272005..115273922	F
						78823	133074	115271789..115274961	F
						111273	133074	115312950..115320123	F
						111273	124946	115312950..115313695	D
	0.000169205	chr9	62600890..62605890	62567584..62571584	132556	151625	132556	62568629..62570758	D
	0.000169205	chr1	71987983..72003083	72020801..72034801	226754	No hit
	0.000169205	chr17	24427132..24430632	24429056..24432056	73964	111248	73964	24429197..24430458	C
						106744	73964	24431805..24432053	D
	0.000169205	chr9	35098518..35103618	35029510..35033410	160400	160400	75561	35088375..35088457	D
						160400	10796	35098184..35098889	F
						160400	105291	35050459..35056431	F
	0.000185467	chr1	131841231..131851831	131984343..131994043	34964	106648	150983	131879915..131880317	D
						34964	150983	131876896..131880317	F
						106648	175774	131903738..131904916	F
						34964	175774	131895121..131940219	F
						34964	74733	131985959..132013838	F
						130809	175774	131938095..131940117	C
	0.000185467	chr10	128479385..128488385	128708535..128717035	98225	133330	82452	128621288..128622530	F
						98225	82452	128621131..128625661	F
						86760	115476	128495717..128495949	D
						98225	109601	128684805..128693024	F
						98225	98040	128522700..128527951	F
						129144	98040	128522700..128522735	C
						98225	177558	128617834..128620849	F
						98225	72060	128699796..128711387	F
						98225	168635	128669000..128674811	F
						98225	177915	128712049..128713265	F
						98225	176592	128675154..128676152	F
						98225	115476	128493854..128495949	F
						98225	11320	128528162..128536562	F
						98225	6190	128637293..128652907	F
	0.000203293	chr6	72583285..72586385	72586116..72589216	40219	40219	76073	72586449..72586496	C
	0.000203293	chr10	128000618..128005518	128008283..128012483	71593	No hit
	0.000203293	chr6	72583277..72586377	72586149..72589249	76073	40219	76073	72586449..72586496	C
	0.000222832	chr8	69568284..69613684	69762435..69807335	227157	227157	149878	69686233..69688192	F
						124702	227177	69801480..69802144	C
						227157	227177	69801480..69805368	F
						112408	84818	69797358..69799653	F
						227157	83569	69806883..69815689	F
						227157	111081	69637426..69648253	F
						74839	84818	69797356..69797384	C
						101986	227177	69805284..69805368	D
						227157	74195	69688873..69699445	F
						227157	83775	69669345..69671586	F
						112408	83569	69806883..69815689	F
						227157	129714	69734464..69738799	F
						227157	84818	69797358..69799653	F
						101986	83569	69806883..69806924	C
						82098	129714	69737668..69738799	D
						112408	227177	69801480..69805368	F
	0.000222832	chr8	70399967..70413067	70400810..70413210	111206	17289	111206	70407401..70410328	F
	0.000244248	chr6	125550243..125554643	125532401..125536501	166582	122021	166582	125535506..125536589	D
	0.000244248	chr7	114944499..114949099	114806169..114810369	98167	98167	10736	114890050..114893146	F
						177613	106854	114919717..114920239	D
						98167	127161	114948274..114949494	F
						126825	107070	114843618..114847131	F
						98167	108003	114874749..114877903	F
						98167	104216	114854841..114864700	F
						126825	104216	114854841..114864700	F
						98167	107070	114843618..114847131	F
						98167	106854	114913219..114920202	F
						98167	169070	114813879..114816504	F
	0.000244248	chr11	118951426..118971426	118798719..118818319	161053	125872	112731	118822780..118828123	F
						226811	113451	118927606..118929804	F
	0.000244248	chr3	89843123..89846623	89802316..89805516	107374	127630	177422	89816843..89817048	D
	0.000267723	chr11	74276901..74283101	74286387..74292287	82958	No hit
	0.000267723	chr11	74276901..74283101	74286300..74292200	221950	No hit
	0.000293453	chr10	121134965..121140265	121152851..121158151	127656	No hit
	0.000293453	chr5	29732454..29735154	29702205..29704705	168335	No hit
	0.000293453	chr10	121134955..121140255	121153249..121158549	78321	No hit
	0.000293453	chr9	107694966..107701566	107774769..107781369	103347	No hit
	0.000293453	chr14	26926728..26931228	26943097..26947197	74691	No hit
	0.000321656	chr7	19926730..19936630	19887509..19896509	119682	160843	222294	19930087..19930783	F
						119682	83051	19875754..19892003	F
						119682	73000	19914863..19916511	F
						119682	222294	19930091..19945717	F
						119682	83179	19917760..19928673	F
						119682	168118	19899801..19901727	F
	0.000352569	chr11	101956074..101967374	101980721..101990421	221946	221946	112693	101960424..101960547	C
	0.000352569	chr5	22821314..22825714	22817937..22821837	21307	No hit
	0.000352569	chr6	83352528..83356428	83355847..83359047	83324	No hit
	0.000352569	chr5	22821499..22825899	22817959..22821859	111765	No hit
	0.000386452	chr10	80224924..80237424	80219943..80231043	11652	No hit
	0.000423591	chr16	4763162..4768362	4695152..4700352	107145	158277	107145	4731610..4767827	F
	0.000423591	chr7	114446447..114455847	114488594..114496794	109125	109125	109209	114446995..114447179	D
	0.000423591	chr18	38249399..38252299	38296492..38299392	71446	71446	151872	38272166..38273357	F
						71446	86680	38249521..38251079	D
	0.000508916	chr11	120347691..120364191	120381823..120397623	125527	10481	125527	120344167..120380573	F
						221928	125527	120392594..120395098	F
						84283	125527	120385080..120392252	F
	0.000508916	chr17	33631204..33635504	33646449..33650749	98265	98265	131388	33631687..33631848	D
	0.000508916	chr5	133177478..133180278	133348625..133351425	182119	182119	110608	133288165..133290054	F
						182119	108364	133180598..133189280	F
						182119	74953	133192329..133223346	F
						76710	110608	133288165..133290054	F
	0.000508916	chr8	105449527..105451727	105446010..105448210	105993	No hit
	0.000508916	chr18	47052165..47054765	47031048..47033448	98956	No hit
	0.000508916	chr18	37122180..37126880	37118382..37122882	40468	No hit
	0.00055782	chr7	52835298..52840498	52890338..52894338	126028	No hit
	0.000611423	chr9	35098645..35103345	35096314..35099814	10796	160400	10796	35098184..35098889	F
	0.000611423	chr4	78276776..78344276	78212125..78279625	132155	No hit
	0.000611423	chr15	85295643..85299243	85301222..85304822	108377	No hit
	0.000611423	chr4	78276789..78344289	78212103..78279603	224627	No hit
	0.000611423	chr12	20017107..20022507	20056880..20062380	226850	No hit
	0.000670174	chr1	75654257..75662257	75654263..75661963	160440	160440	108936	75658364..75658998	C
	0.000670174	chr11	98435479..98440079	98442026..98446126	168915	82551	168915	98440119..98444525	F
	0.000670174	chr11	98435428..98440028	98442013..98446113	82551	82551	168915	98440119..98444525	F
	0.000734569	chr6	89153676..89179576	89039249..89063249	109789	102295	113716	89061302..89061370	D
						102295	130173	89121390..89124511	F
	0.000734569	chr10	86583376..86586176	86426646..86429246	103741	103741	103127	86438886..86441504	F
	0.000734569	chr17	33090936..33094836	33095772..33098972	176870	No hit
	0.000734569	chr16	18203199..18207099	18187533..18190833	72153	71562	72153	18203421..18203516	D
						85220	72153	18193686..18198990	F
	0.000734569	chr17	72267556..72271756	72338618..72342618	108694	No hit
	0.000734569	chr9	62600806..62604706	62568024..62571524	151625	151625	132556	62568629..62570758	D
	0.000805149	chr5	88046022..88064122	88237104..88253804	2302	No hit
	0.000805149	chr11	120201008..120207908	120197233..120203033	81815	No hit
	0.000882508	chr17	23493163..23496063	23496828..23500228	179555	179555	226927	23495737..23495752	C
	0.000882508	chr17	23493010..23496010	23496860..23499860	157808	179555	226927	23495737..23495752	C
	0.000882508	chr10	60844663..60849963	60854198..60858998	168166	No hit
	0.000967295	chr8	84333735..84361235	84230192..84254492	82475	120687	149906	84349968..84350350	D
						161148	82475	84266149..84281163	F
						120687	77801	84353248..84353372	C
						227168	177231	84338150..84338522	D
						82082	82475	84225402..84232122	F
						98674	82475	84245168..84250354	F
						98674	111125	84248282..84250380	C
						98905	82475	84304830..84308286	F
						119273	77801	84358794..84359360	D
						227168	82475	84338150..84345335	F
						157091	82475	84315005..84335673	F
						157091	177231	84334852..84335670	F
						120687	82475	84349968..84353372	F
						119273	82475	84358794..84360392	F
	0.000967295	chr13	23225108..23232308	23276442..23283042	106929	No hit
	0.000967295	chr11	5885585..5904685	5901688..5920788	107361	131014	107361	5901050..5903116	F
						124358	107361	5903915..5906231	F
